# Supplementary material for: Crystallographic controls on uranyl binding at the quartz/water interface
Source: Royal Society of Chemistry journal article supplement (doi:10.1039/c0cp01406k), 2011-01-01
Supplement: c0cp01406k.pdf [file c0cp01406k.pdf]

## SUPPLEMENTARY MATERIAL

### Crystallographic controls on uranyl binding at the quartz/water interface.

Jean-François Boily<sup>1,\*</sup> and Kevin M. Rosso<sup>2</sup>

1. Department of Chemistry, Umeå University, SE-901 87 Umeå, Sweden

2. Chemical and Materials Sciences Division, Pacific Northwest National Laboratory, Richland, WA 99352, USA

\* corresponding author. jean-francois.boily@chem.umu.se ; tel. +46 90 786 5270

#### Description of force field model and parameters

Potential energy was calculated in Gromacs<sup>1</sup> (v.3.3.3) as the sum of non-bonded (Coulombic and van der Waals) and bonded (bond stretch and bend) interactions. Coulombic energy is expressed as:

$$V_C(\mathbf{r}_{ij}) = \frac{q_i \cdot q_j}{f \cdot r_{ij}} \quad [1]$$

where  $f = 4\pi\epsilon_0\epsilon_p e^{-2}$ ,  $\epsilon_0$  is the permittivity of vacuum,  $\epsilon_p$  the relative dielectric constant and  $e$  elementary charge. van der Waals energy is represented by the Lennard-Jones (12-6) function:

$$V_{LJ}(\mathbf{r}_{ij}) = 4\epsilon_{ij} \left[ \left( \frac{\sigma_{ij}}{r_{ij}} \right)^{12} - \left( \frac{\sigma_{ij}}{r_{ij}} \right)^6 \right] \quad [2]$$

using Lorentz-Berthelot mixing rules:

$$\sigma_{ij} = \frac{1}{2}(\sigma_{ii} + \sigma_{jj}) \quad [3]$$

$$\epsilon_{ij} = \sqrt{\epsilon_{ii}\epsilon_{jj}} \quad [4]$$

Finally the bonded potential energies were described by harmonic stretches

$$V_b(\mathbf{r}_{ij}) = \frac{1}{2}k_{ij}^b (r_{ij} - b_{ij})^2 \quad [5]$$

for all hydroxyl (O-H) and uranyl (U=O) bonds, and harmonic bends

$$V_a(\theta_{ijk}) = \frac{1}{2} k^\theta (\theta_{ijk} - \theta_{ijk}^0)^2 \quad [6]$$

in water (H-O-H), surface sites (Si-O<sub>s</sub>-H<sub>s</sub>) and uranyl (O<sub>u</sub>-U-O<sub>u</sub>). More details on computational procedures (*e.g.* cut-off etc...) for the quartz-water system are detailed in the Methods section of this paper.

Force field parameters of CLAYFF<sup>2</sup> for α-SiO<sub>2</sub>, flexible SPC<sup>3</sup> for water and CHARMM<sup>4</sup> parameters for uranyl were converted for equations and units used in Gromacs (Table S1).

**Table S1.** Potential parameters<sup>a</sup>

| atom <sup>a</sup> | description                       | q      | σ       | ε                       | source |
|-------------------|-----------------------------------|--------|---------|-------------------------|--------|
| H                 | H <sub>2</sub> O, OH <sup>-</sup> | 0.410  | 0       | 0                       | [2-3]  |
| H <sub>s</sub>    | OH surface                        | 0.425  | 0       | 0                       | [2]    |
| O                 | H <sub>2</sub> O, OH <sup>-</sup> | -0.820 | 0.31655 | 0.65019                 | [2-3]  |
| O <sub>q</sub>    | SiO <sub>2</sub>                  | -1.050 | 0.31655 | 0.65019                 | [2]    |
| O <sub>s</sub>    | O(H) surface                      | -0.950 | 0.31655 | 0.65019                 | [2]    |
| O <sub>u</sub>    | UO <sub>2</sub>                   | -0.250 | 0.31655 | 0.65019                 | [4]    |
| Si                | SiO <sub>2</sub>                  | 2.100  | 0.33020 | 7.7007×10 <sup>-6</sup> | [2]    |
| U                 | UO <sub>2</sub>                   | 2.500  | 0.28152 | 1.6736                  | [4]    |

  

| bond <sup>b</sup>              |                                   | k <sup>b</sup> | b     |       |
|--------------------------------|-----------------------------------|----------------|-------|-------|
| O-H                            | H <sub>2</sub> O, OH <sup>-</sup> | 463700         | 0.100 | [2-3] |
| O <sub>q</sub> -H <sub>s</sub> | OH surface                        | 463700         | 0.100 | [2]   |
| U-O <sub>u</sub>               | UO <sub>2</sub>                   | 8368           | 0.177 | [4]   |

  

| bend <sup>c</sup>                 |                  | k <sup>θ</sup> | θ <sup>0</sup> |       |
|-----------------------------------|------------------|----------------|----------------|-------|
| H-O-H                             | H <sub>2</sub> O | 383            | 109.47         | [2-3] |
| Si-O <sub>s</sub> -H <sub>s</sub> | OH surface       | 251            | 109.47         | [2]   |
| O <sub>u</sub> -U-O <sub>u</sub>  | UO <sub>2</sub>  | 1255           | 180.00         | [4]   |

a. q is charge (e), σ(nm) is the finite distance at which the inter-particle Lennard-Jones potential is zero and ε (kJ/mol) is the Lennard-Jones potential well. Values of σ (nm) from R<sub>o</sub> (Å) in CLAYFF ( $V_{LJ} = \epsilon((R_{o,ij}/r_{ij})^{1/12} - 2(R_{o,ij}/r_{ij})^{1/6})$ ) were obtained as  $\sigma = R_o/10/2^{1/6}$ . Those from CHARMM-compatible R\* of Guilbaud and Wipff ( $V_{LJ} = \epsilon((R^*_{ij}/r_{ij})^{1/12} - 2(R^*_{ij}/r_{ij})^{1/6})$  where  $R^* = R^*_i + R^*_j$ ) were obtained as  $\sigma = (R^* + R^*)/10/2^{1/6}$ . These latter values are consistent with those of the OPLS database already present in Gromacs<sup>1</sup>.

b. k<sup>b</sup> (kJ mol<sup>-1</sup> nm<sup>-2</sup>) is the harmonic potential constant and b (nm) the equilibrium bond length.

c. k<sup>θ</sup> (kJ mol<sup>-1</sup> rad<sup>-2</sup>) is the harmonic angle potential and θ<sup>0</sup> (deg) is the equilibrium angle.

## References

1. D. van der Spoel, E. Lindahl, B. Hess, G. Groenhof, A.E. Mark, H.J.C. Berendsen. 2005. *J. Comp. Chem.* 2005. **26**, 1701.
2. R.J. Cygan, J.-J. Liang, A.G. Kalinichev. *J. Phys. Chem. B.* 2004. **108**, 1255.
3. O. Teleman, B. Jonsson, S. Engström. *Mol. Phys.* 1987, **60**, 193
4. P. Guilbaud, G. Wipff. *J. Mol. Struct. (THEOCHEM)* 1996, **366**, 55.
